# Supplementary material
Source: publisher figshare collection journal article supplement (https://springernature.figshare.com/ndownloader/files/7642579)
Supplement: Supplementary file 1 [file 7642579]

**Effect of temperature on a miniaturized microbial fuel cell (MFC) (supplementary material)**

Hao Ren, Chenming Jiang and Junseok Chae

School of Electrical, Computer and Energy Engineering, Arizona State University, Tempe, Arizona, U.S.A.

*To whom correspondence should be addressed. E-mail: [hren12@asu.edu](mailto:hren12@asu.edu)





Figure S1 Current density versus time during the start-up process of the miniaturized MFC at 314 K. It takes approximately 7.5 days for the miniaturized MFC to finish the start-up process.


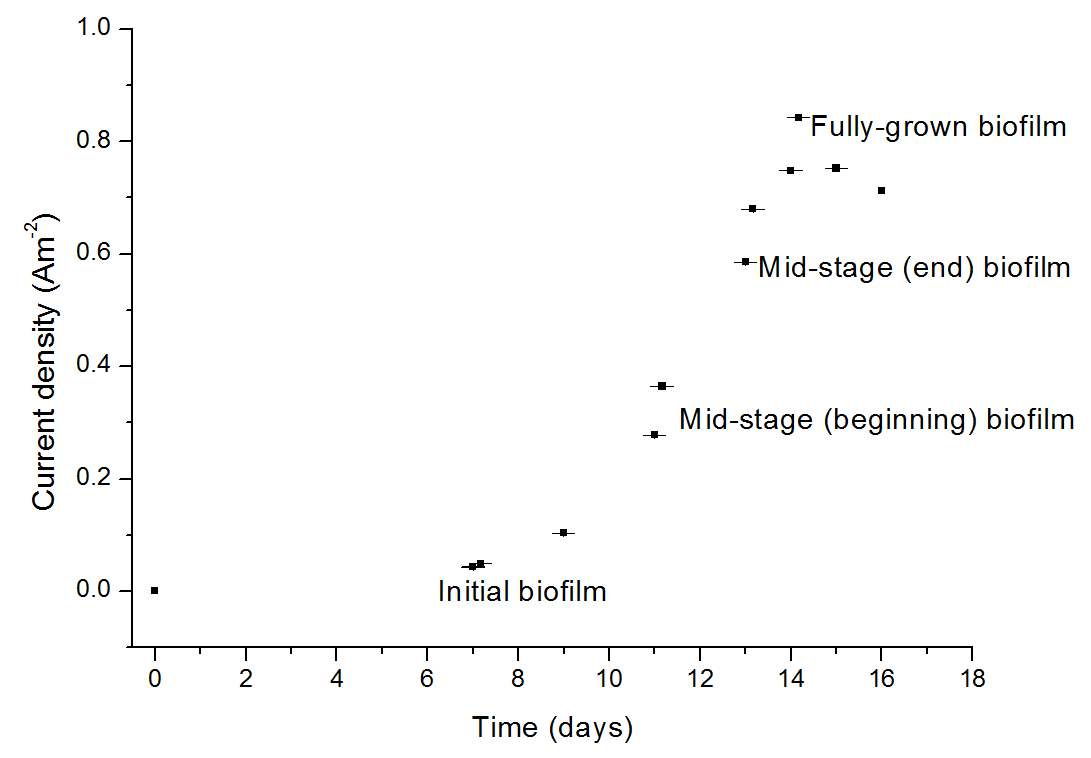


Figure S2 Current density versus time during the start-up process of the miniaturized MFC at 294 K. It takes approximately 14 days for the miniaturized MFC to finish the start-up process at 294 K. The initial biofilm, mid-stage (beginning) biofilm, mid-stage (end) biofilm and fully-grown biofilm are marked in the Figure. Please note that because the MFC was operated at a much lower temperature compared with Figure S1 (294 K vs. 314 K), the maximum current density is lower than Figure S1, and the start-up process is longer than Figure S1, due to the slow reaction kinetics low temperature.


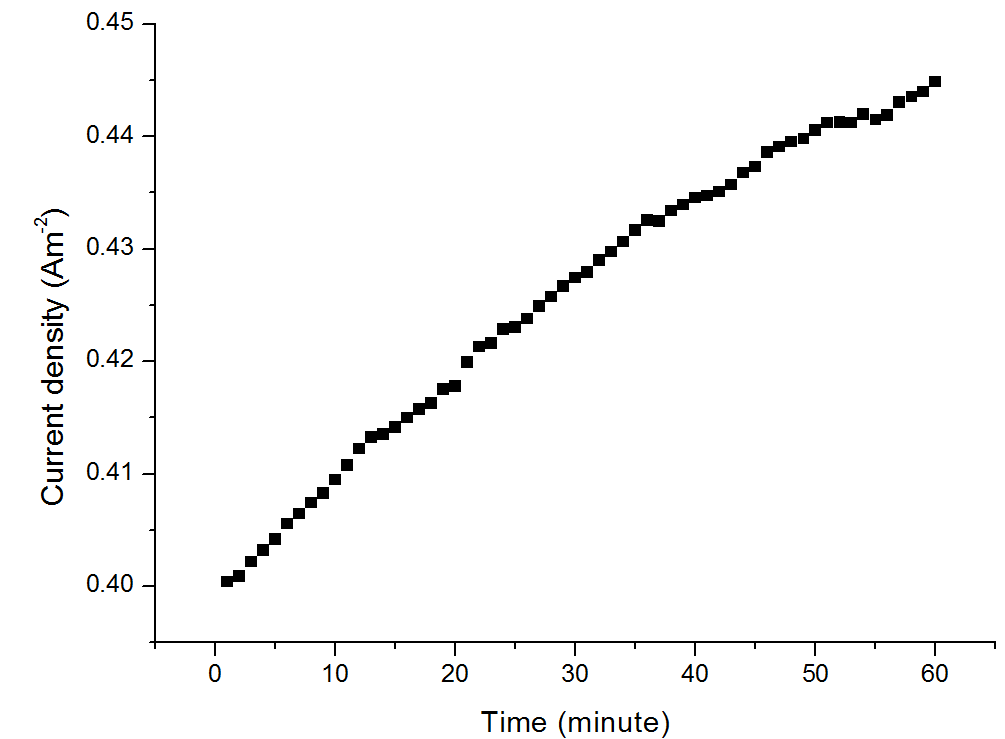


Figure S3 Increase of current density versus time during a 60-minute period in the start-up process at 314 K. We can see that during 60 minutes, the current density increased only 10%, and in 5 minute the current density only increase 1.28%, which can be negligible for the calculation in the activation energy.

First-order calculation of the miniaturized MFC temperature increase in 5-7 minutes:

Volumetric heat capacity of the glass: 2.1 J/cm3/K

Volumetric heat capacity of the water: 4.18 J/cm3/K

Volume of two glass slides: 2*4.6*2.6*0.1=2.392 cm3

Volume of anolyte and catholyte: 2*100 µL=0.2 cm3

As a result, the heat for the miniaturized MFC (glass slides, anolyte and catholyte) to increase 1 K is

2.1*2.392+4.18*0.2=5.8592 Jole.

For an increment of 4 K, 23.4368 Jole is needed.

According to “R.R. Tummala, Fundamentals of Microelectronic Packaging, 1st edition, chapter 6, Fundamentals of Thermal Management”, the heat transfer flux can be described as:

qrad=σ(T14-T24)/(1/ξ1+1/ξ2-1)

where T1 and T2 are the temperature of the radiating elements: oven and the MFC, respectively (T1=548K and T2=294K). σ is the Stefan-Boltzmann constant (5.67x10-8W/m2/K), and ξ1, ξ2 are the emissivity of the radiating element of oven and the MFC, respectively (ξ1= ξ2=0.02). We can compute the radiation heat transfer rate to MFC is Qrad=qA=0.0618 W (here A is the surface area of the MFC). In 5 minutes, the heat transferred to the MFC is 0.0618*300=18.54 Jole

Let us consider the heat transfer by convection. The heat transfer coefficient is 15 W/m2/K for natural heat convection in air. ΔT of 4K, we can calculate the convention heat transfer rate as: Qcon=15*2A*4=0.1436W. Thus, in 5 minutes, the heat transferred to the MFC by natural convection in air is 0.1436*300=43.08 Jole.

This first-order hand calculation shows we need to wait ~ 2.7 minutes to increase the temperature of MFC by 4K in our setting. There are, obviously, other methods to control the temperature of MFC, yet we took 5-7 minutes to accommodate the heat transfer rate of oven to MFC in our setting.
